# Supplementary material for: Gene selection for cancer identification: a decision tree model empowered by particle swarm optimization algorithm
Source: Springer Nature journal article supplement (doi:10.1186/1471-2105-15-49), 2014-02-20
Supplement: 12859_2013_6322_MOESM2_ESM.pdf [file 12859_2013_6322_MOESM2_ESM.pdf]

218934\_s\_at <= 2.7133 (Node 2)  
| 206166\_s\_at <= 2.5063 (Node 4)  
| | 212341\_at <= 10.026: Ovary (114.0) (Node 5)  
| | 212341\_at > 10.026: Cervix Uteri (5.0) (Node 6)  
| 206166\_s\_at > 2.5063: Cervix Uteri (59.0) (Node 3)  
218934\_s\_at > 2.7133: Uterus (29.0) (Node 1)
