# Supplementary material for: Gene selection for cancer identification: a decision tree model empowered by particle swarm optimization algorithm
Source: Springer Nature journal article supplement (doi:10.1186/1471-2105-15-49), 2014-02-20

# Classification Accuracy (%)

0.95 confidence intervals

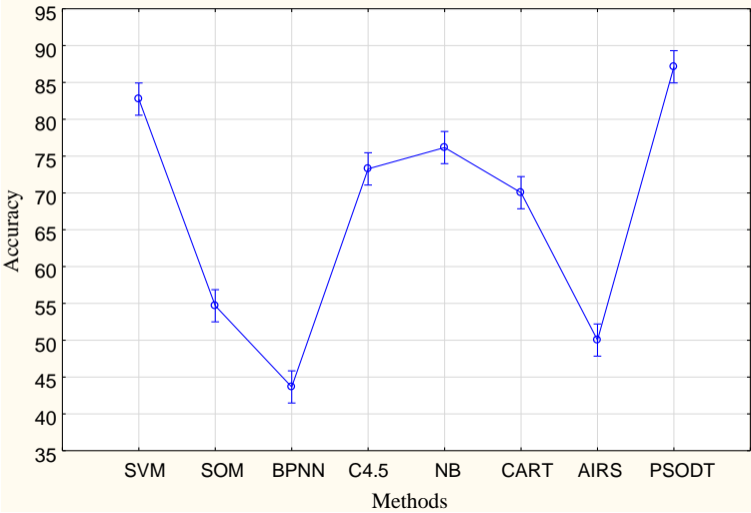

Supplement: 12859_2013_6322_MOESM3_ESM.pdf [file 12859_2013_6322_MOESM3_ESM.pdf]
